# Supplementary material for: Exploring the syntheses, structures, topologies, luminescence sensing and magnetism of Zn(ii) and Mn(ii) coordination polymers based on a semirigid tricarboxylate ligand
Source: Royal Society of Chemistry journal article supplement (doi:10.1039/c8ce00947c), 2018-01-01
Supplement: c8ce00947c1.pdf [file c8ce00947c1.pdf]

Supporting Information for the Manuscript  
**Exploring the Syntheses, Structures, Topologies,  
Luminescence Sensing and Magnetism of Zn(II) and  
Mn(II) Coordination Polymers Based on a Semirigid  
Tricarboxylate Ligand**

Shaodong Li<sup>a</sup>, Liping Lu<sup>\*a</sup>, Miaoli Zhu<sup>\*a,c</sup>, Sisi Fen<sup>a,c</sup>, Feng Su<sup>b</sup>,  
Xuefeng Zhao<sup>a,c</sup>

<sup>a</sup>Institute of Molecular Science, Key Laboratory of Chemical  
Biology and Molecular Engineering of the Education Ministry,  
Shanxi University, Taiyuan, Shanxi 030006, People's Republic of  
China. luliping@sxu.edu.cn

<sup>b</sup>Department of chemistry, Changzhi University, Changzhi 046011,  
People's Republic of China.

<sup>c</sup>Key Laboratory of Materials for Energy Conversion and Storage of  
Shanxi Province; Shanxi University, Taiyuan, Shanxi 030006,  
People's Republic of China. miaoli@sxu.edu.cn

**Tables S1.** Selected bond lengths [Å] and angles [°] for complexes 1-4.

---

| Complex 1           |            |                      |           |
|---------------------|------------|----------------------|-----------|
| Mn(1)-O(1)          | 2.0986(16) | O(1)-Mn(1)-O(2)#1    | 109.34(8) |
| Mn(1)-O(2)#1        | 2.1313(18) | O(1)-Mn(1)-O(3)#2    | 99.05(8)  |
| Mn(1)-O(3)#2        | 2.1572(17) | O(2)#1-Mn(1)-O(3)#2  | 89.30(8)  |
| Mn(1)-O(8)          | 2.251(3)   | O(1)-Mn(1)-O(8)      | 88.54(9)  |
| Mn(1)-N(1)          | 2.292(2)   | O(2)#1-Mn(1)-O(8)    | 161.89(9) |
| Mn(1)-N(2)          | 2.304(2)   | O(3)#2-Mn(1)-O(8)    | 90.69(9)  |
| O(1)-Mn(1)-O(2)#1   | 109.34(8)  | N(2)-Mn(1)-O(2)#2    | 149.29(7) |
| O(1)-Mn(1)-O(3)#2   | 99.05(8)   | N(1)-Mn(1)-O(2)#2    | 85.68(8)  |
| O(2)#1-Mn(1)-O(3)#2 | 89.30(8)   | O(4)-Mn(1)-C(15)#2   | 130.38(8) |
| O(1)-Mn(1)-O(8)     | 88.54(9)   | O(5)#1-Mn(1)-C(15)#2 | 100.66(9) |
| O(2)#1-Mn(1)-O(8)   | 161.89(9)  | O(3)#2-Mn(1)-C(15)#2 | 29.32(8)  |
| O(3)#2-Mn(1)-O(8)   | 90.69(9)   | N(2)-Mn(1)-C(15)#2   | 125.81(8) |
| O(1)-Mn(1)-N(1)     | 156.43(9)  | N(1)-Mn(1)-C(15)#2   | 87.36(8)  |
| O(2)#1-Mn(1)-N(1)   | 89.54(10)  | O(2)#2-Mn(1)-C(15)#2 | 28.90(8)  |

  

| Complex 2           |            |                      |            |
|---------------------|------------|----------------------|------------|
| Mn(1)-O(8)          | 2.139(3)   | O(8)-Mn(1)-N(7)      | 87.65(14)  |
| Mn(1)-O(10)#1       | 2.175(4)   | O(10)#1-Mn(1)-N(7)   | 95.09(14)  |
| Mn(1)-O(1)          | 2.212(4)   | O(1)-Mn(1)-N(7)      | 86.88(14)  |
| Mn(1)-N(3)          | 2.214(4)   | N(3)-Mn(1)-N(7)      | 172.79(17) |
| Mn(1)-O(15)         | 2.218(3)   | O(15)-Mn(1)-N(7)     | 91.12(14)  |
| Mn(1)-N(7)          | 2.252(4)   | O(12)#1-Mn(2)-O(9)   | 96.82(13)  |
| Mn(2)-O(12)#1       | 2.168(3)   | O(12)#1-Mn(2)-O(3)#2 | 83.34(13)  |
| Mn(2)-O(9)          | 2.172(4)   | O(9)-Mn(2)-O(3)#2    | 179.17(13) |
| Mn(2)-O(3)#2        | 2.175(3)   | O(12)#1-Mn(2)-O(2)#3 | 170.34(14) |
| Mn(2)-O(2)#3        | 2.193(4)   | O(9)-Mn(2)-O(2)#3    | 91.00(13)  |
| Mn(2)-N(5)          | 2.272(4)   | O(3)#2-Mn(2)-O(2)#3  | 88.75(14)  |
| Mn(2)-N(2)          | 2.279(4)   | O(12)#1-Mn(2)-N(5)   | 99.31(14)  |
| O(8)-Mn(1)-O(10)#1  | 95.95(14)  | O(9)-Mn(2)-N(5)      | 88.28(14)  |
| O(8)-Mn(1)-O(1)     | 90.59(14)  | O(3)#2-Mn(2)-N(5)    | 92.49(14)  |
| O(10)#1-Mn(1)-O(1)  | 173.24(13) | O(2)#3-Mn(2)-N(5)    | 86.53(14)  |
| O(8)-Mn(1)-N(3)     | 96.93(15)  | O(12)#1-Mn(2)-N(2)   | 85.76(15)  |
| O(10)#1-Mn(1)-N(3)  | 89.99(15)  | O(9)-Mn(2)-N(2)      | 87.17(15)  |
| O(1)-Mn(1)-N(3)     | 87.50(15)  | O(3)#2-Mn(2)-N(2)    | 92.04(15)  |
| O(8)-Mn(1)-O(15)    | 175.01(14) | O(2)#3-Mn(2)-N(2)    | 89.00(15)  |
| O(10)#1-Mn(1)-O(15) | 79.33(13)  | N(5)-Mn(2)-N(2)      | 173.56(16) |
| O(1)-Mn(1)-O(15)    | 94.18(13)  | N(3)-Mn(1)-O(15)     | 84.78(15)  |

---

---

### Complex 3

|                   |            |                     |            |
|-------------------|------------|---------------------|------------|
| Zn(1)-O(1)        | 1.978(2)   | O(1)-Zn(1)-O(4)#1   | 111.54(11) |
| Zn(1)-O(4)#1      | 2.012(2)   | O(1)-Zn(1)-O(2)#2   | 112.52(10) |
| Zn(1)-O(2)#2      | 2.058(2)   | O(4)#1-Zn(1)-O(2)#2 | 84.71(10)  |
| Zn(1)-N(2)        | 2.149(3)   | O(1)-Zn(1)-N(2)     | 100.04(11) |
| Zn(1)-N(1)        | 2.156(3)   | O(4)#1-Zn(1)-N(2)   | 100.97(11) |
| O(4)#1-Zn(1)-N(1) | 154.18(11) | O(2)#2-Zn(1)-N(2)   | 142.31(11) |
| O(2)#2-Zn(1)-N(1) | 82.38(10)  | O(1)-Zn(1)-N(1)     | 94.07(10)  |
| N(2)-Zn(1)-N(1)   | 76.71(11)  |                     |            |

### Complex 4

|                   |            |                     |            |
|-------------------|------------|---------------------|------------|
| Zn(1)-O(1)        | 2.057(4)   | N(2)-Zn(1)-O(1)#1   | 90.46(17)  |
| Zn(1)-N(2)        | 2.089(5)   | O(5)-Zn(1)-O(1)#1   | 170.19(18) |
| Zn(1)-O(5)        | 2.109(4)   | O(1)-Zn(1)-O(8)     | 154.98(18) |
| Zn(1)-O(7)        | 2.146(5)   | N(2)-Zn(1)-O(8)     | 96.8(2)    |
| Zn(1)-O(1)#1      | 2.175(4)   | O(5)-Zn(1)-O(8)     | 92.8(2)    |
| Zn(1)-O(8)        | 2.235(6)   | O(7)-Zn(1)-O(8)     | 59.9(2)    |
| Zn(1)-C(15)       | 2.537(7)   | O(1)#1-Zn(1)-O(8)   | 96.38(18)  |
| Zn(2)-O(4)        | 1.956(4)   | O(1)-Zn(1)-C(15)    | 125.4(2)   |
| Zn(2)-O(1)        | 1.961(4)   | N(2)-Zn(1)-C(15)    | 126.2(2)   |
| Zn(2)-O(3)#2      | 1.994(5)   | O(5)-Zn(1)-C(15)    | 97.7(2)    |
| Zn(2)-N(1)#3      | 2.018(5)   | O(7)-Zn(1)-C(15)    | 30.3(2)    |
| O(1)-Zn(1)-N(2)   | 107.91(19) | O(1)#1-Zn(1)-C(15)  | 91.94(18)  |
| O(1)-Zn(1)-O(5)   | 92.97(18)  | O(8)-Zn(1)-C(15)    | 29.6(2)    |
| N(2)-Zn(1)-O(5)   | 85.15(19)  | O(4)-Zn(2)-O(1)     | 108.86(18) |
| O(1)-Zn(1)-O(7)   | 95.15(19)  | O(4)-Zn(2)-O(3)#2   | 122.3(2)   |
| N(2)-Zn(1)-O(7)   | 156.3(2)   | O(1)-Zn(2)-O(3)#2   | 99.78(18)  |
| O(5)-Zn(1)-O(7)   | 99.5(2)    | O(4)-Zn(2)-N(1)#3   | 100.4(2)   |
| O(1)-Zn(1)-O(1)#1 | 80.03(17)  | O(1)-Zn(2)-N(1)#3   | 127.04(19) |
| N(2)-Zn(1)-O(1)#1 | 90.46(17)  | O(3)#2-Zn(2)-N(1)#3 | 100.4(2)   |
| O(5)-Zn(1)-O(1)#1 | 170.19(18) |                     |            |

---

Symmetry codes: for complex 1: #1 -x+1, -y, -z+1; #2 -x+1, -y, -z; for complex 2: #1 x, y-1, z; #2 x-1, y-1, z; #3 x-1, y, z; for complex 3: #1 x, -y+1/2, z-1/2; #2 -x+1, -y, -z; for complex 4: #1 -x+1, -y+1, -z+1; #2 -x, y-1/2, -z+1/2; #3 x, y, z-1.

**Tables S2.** Hydrogen bonds in crystal packing [ $\text{\AA}$ ,  $^\circ$ ] of complexes 1-3.

|          | D-H...A              | $d(\text{D-H})$ | $d(\text{H...A})$ | $d(\text{D...A})$ | $\angle(\text{DHA})$ | Symmetry code       |
|----------|----------------------|-----------------|-------------------|-------------------|----------------------|---------------------|
| <b>1</b> | O(8)-H(8A)...O(5)    | 0.84            | 2.39              | 3.008(7)          | 131.4                | $x, -y+1/2, z-1/2$  |
|          | O(8)-H(8B)...O(3)    | 0.83            | 1.88              | 2.661(6)          | 156.6                | $-x, y-1/2, -z+1/2$ |
|          | O(6)-H(6)...O(8)     | 0.84            | 1.67              | 2.506(6)          | 175.2                |                     |
| <b>2</b> | O(15)-H(15B)...O(11) | 0.82            | 2.31              | 3.121(5)          | 168.6                | $x, y-1, z$         |
|          | O(15)-H(15A)...O(3)  | 0.82            | 1.86              | 2.651(5)          | 162.8                | $x, y-1, z$         |
|          | O(13)-H(13)...O(4)   | 0.82            | 1.79              | 2.612(5)          | 176.0                | $-x+2, -y+3, -z+1$  |
|          | O(7)-H(7A)...O(6)    | 0.82            | 1.84              | 2.648(6)          | 168.1                | $-x+1, -y+2, -z$    |
| <b>3</b> | O(6)-H(6A)...O(3)    | 0.82            | 1.92              | 2.705(4)          | 159.3                | $x+1, y, z$         |
|          | O(8)-H(8A)...O(5)    | 0.82            | 2.41              | 3.091(7)          | 141.5                | $x, -y+1/2, z+1/2$  |
|          | O(8)-H(8B)...O(3)    | 0.82            | 1.97              | 2.778(8)          | 169.3                |                     |

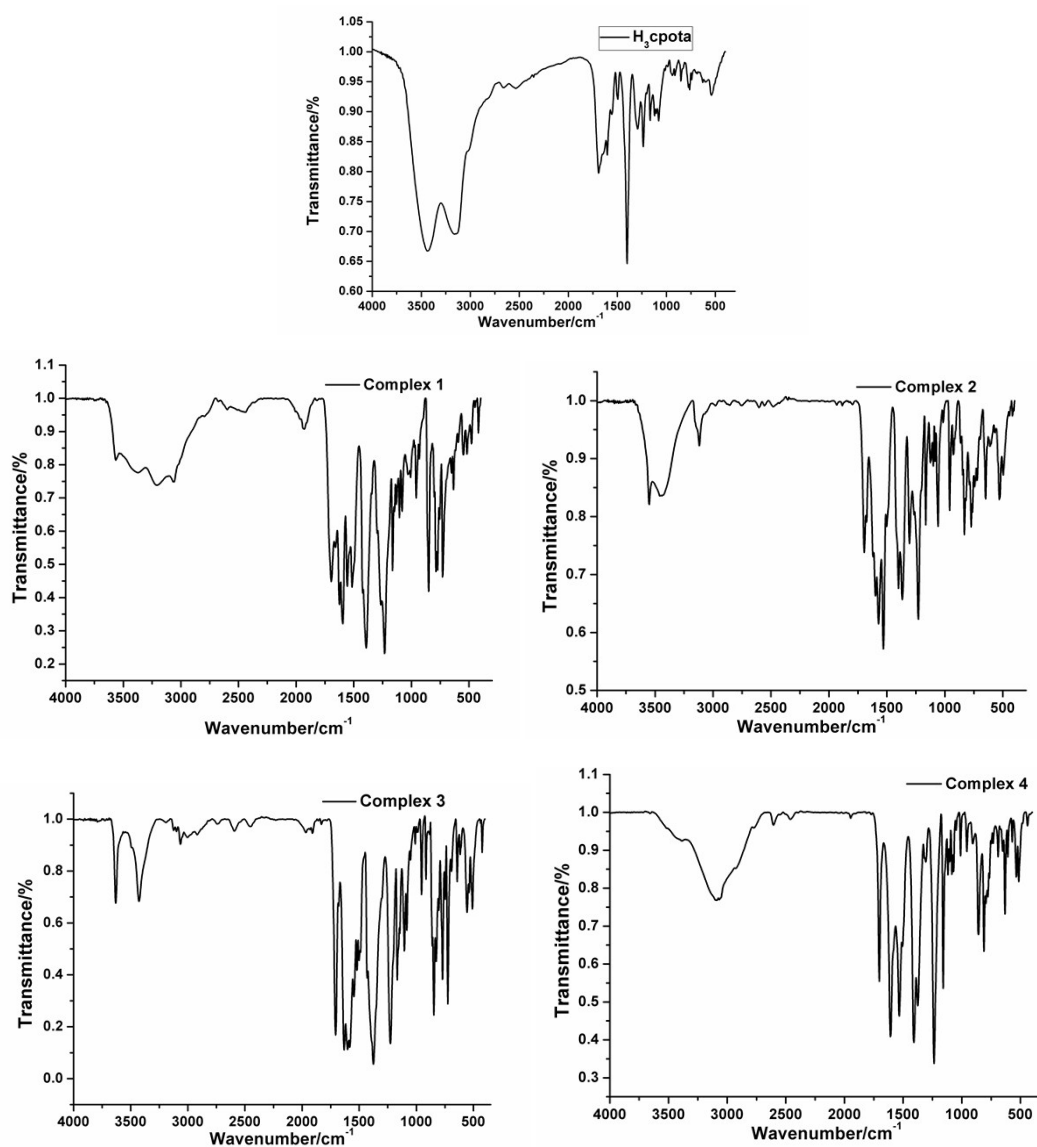**Fig. S1** The IR spectra of H<sub>3</sub>cpota ligand and complexes 1-4.

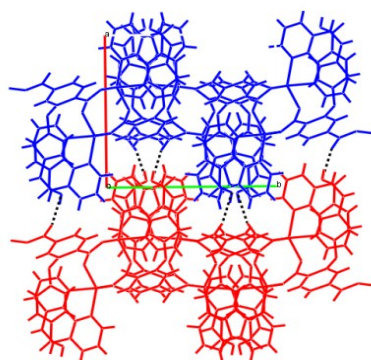

**Fig. S2** 3D supramolecular architecture of **3** viewed along the *ab* plane. (Blank dotted lines present the H-bonds).

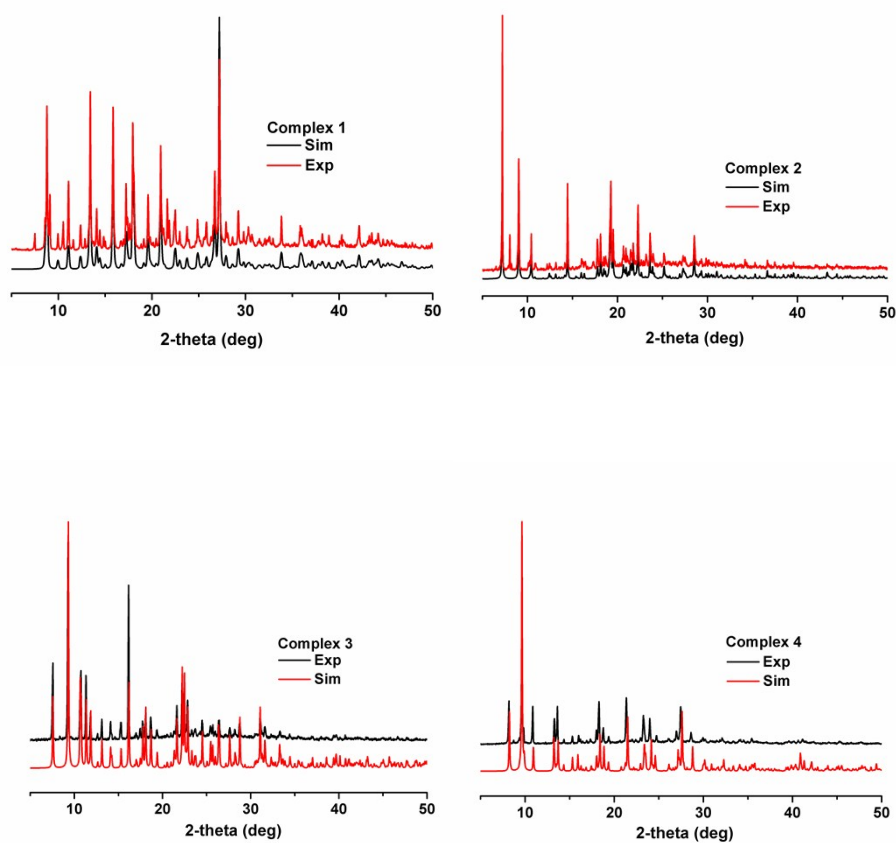

**Fig. S3** PXR D patterns of complexes **1–4** at room temperature. Blank patterns correspond to the experimental data obtained using the as-synthesized bulk samples. Red patterns were simulated from the single crystal X-ray data.

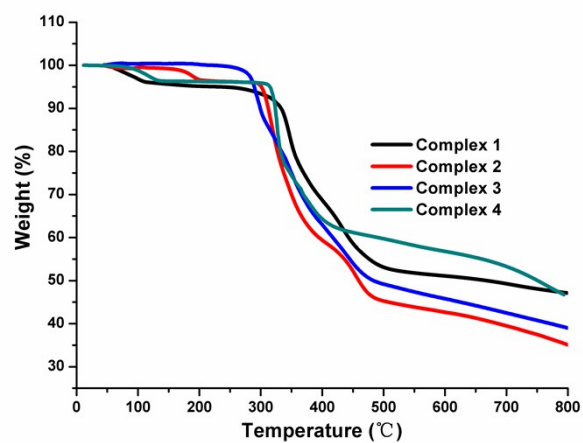

Fig. S4 The thermal curves of complexes 1-4.

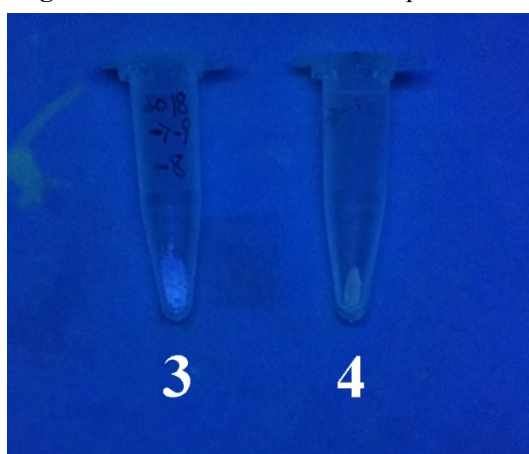

Fig. S5 Digital photograph for the fluorescence of complexes 3 and 4 under 365nm UV radiation.

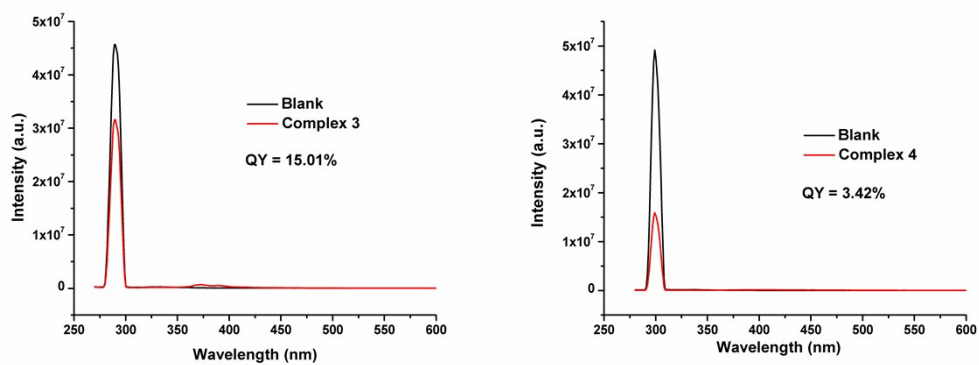

Fig. S6 The luminescent quantum yields of complexes 3 and 4.

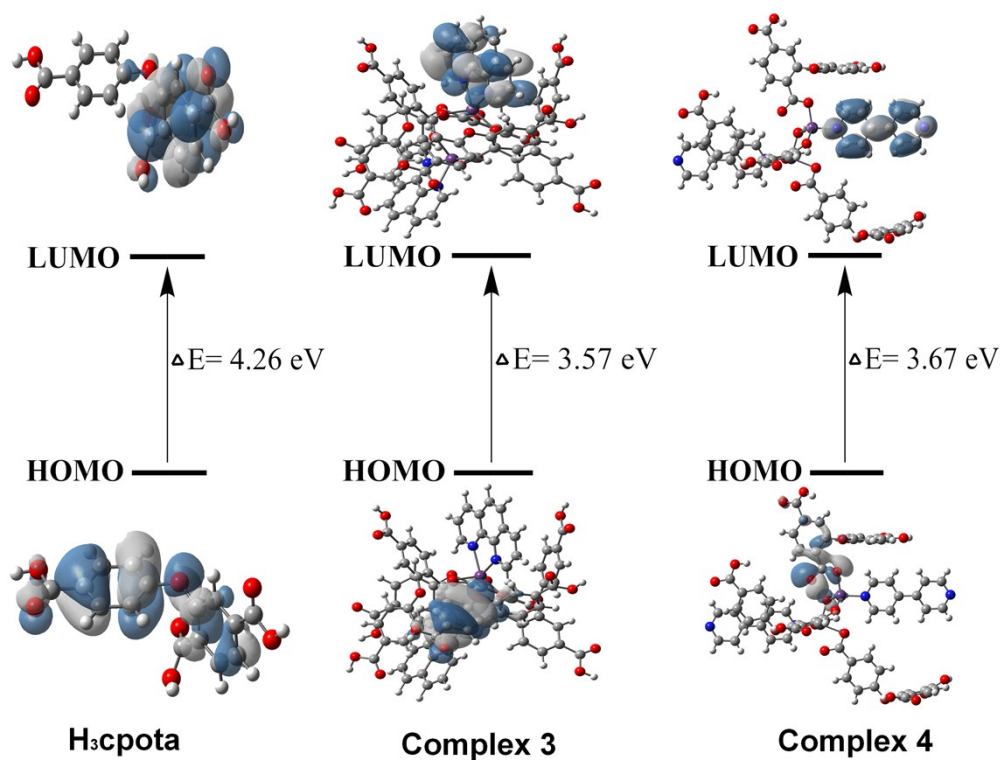

Fig. S7 The frontier MOs of H<sub>3</sub>cpota ligand and complexes 3 and 4.

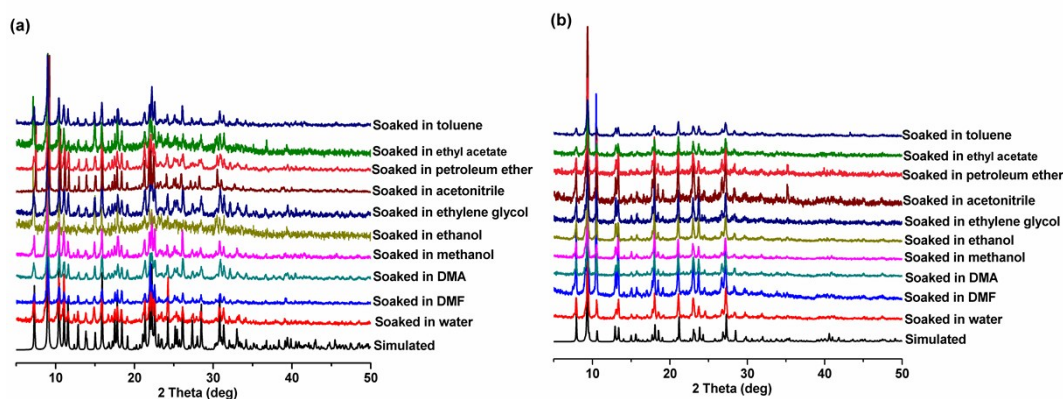

Fig. S8 PXRD patterns of 3 (a) and 4 (b) in different solvent.

Table S3. ICP experiments of 3 and 4 after immersing in aqueous solution

| Sample                          | Concentration of Zn(II) ions (ug/mL) |
|---------------------------------|--------------------------------------|
| Blank sample (H <sub>2</sub> O) | 0.0562                               |
| Sample 1                        | 0.5230                               |
| Sample 2                        | 0.2796                               |

(The Sample 1 was the aqueous solution after 10 mg samples of 3 immersed for one week, The Sample 2 was the aqueous solution after 10 mg samples of 4 immersed for one week.)

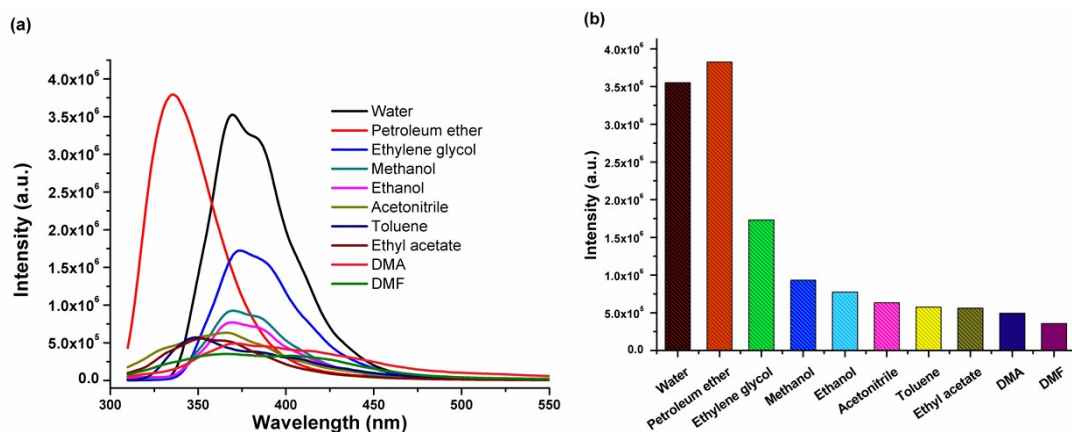

**Fig. S9** (a) The emission spectra of complex **3** in different solvents. (b) The emission intensity of complex **3** in different solvents.

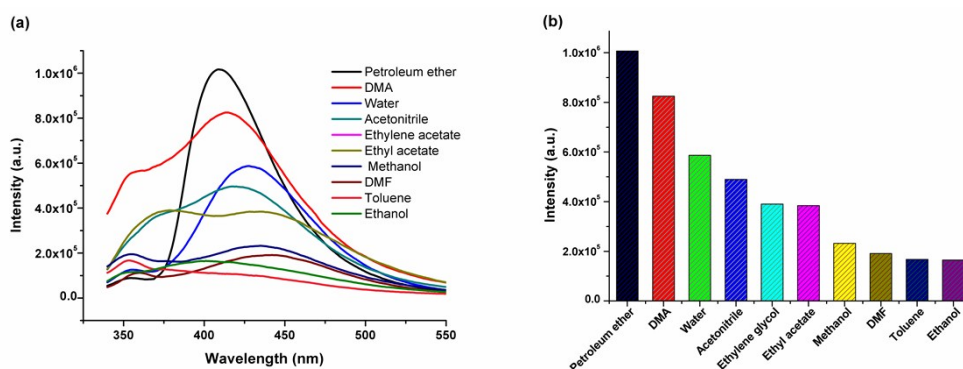

**Fig. S10** (a) The emission spectra of complex **4** in different solvents. (b) The emission intensity of complex **4** in different solvents.

### Section S1: Calculation of detection limit for $\text{Cr}_2\text{O}_7^{2-}$ and $\text{CrO}_4^{2-}$ .

Detection limit ( $\text{LOD} = 3\sigma/m$ ) was calculated as early reports,<sup>S1</sup> where the  $\sigma$  equal to  $100 \times (I_{SE}/I_0)$ ,  $I_{SE}$  is the standard error of the luminescence intensity measurement, as determined by the baseline measurement of blank samples monitored at 370 nm, and  $I_0$  is the measured luminescence intensity of **3** in deionized water. The slope( $m$ ) was obtained from the linear fit of the concentration-dependent luminescence intensity curve in the low concentration region. In a typical experiment to determine limit of detection, incremental amount of 0.001 M aqueous  $\text{Cr}_2\text{O}_7^{2-}/\text{CrO}_4^{2-}$  solution in the volume ranging 0.0  $\mu\text{L}$  to 100  $\mu\text{L}$  was added to the water suspension (2 mg complex **3** dispersed in 2 ml water) of complex **3**. The slope should be the correlation between the chromium concentration and  $(I_0 - I)/I_0\%$ .  $I$  is the fluorescence intensity thus observed for each incremental addition of aqueous  $\text{Cr}_2\text{O}_7^{2-}/\text{CrO}_4^{2-}$  solution. Slope of the curve thus drawn was found to be  $\text{Cr}_2\text{O}_7^{2-} = 0.685$  ( $R_2 = 0.996$ );  $\text{CrO}_4^{2-} = 0.275$  ( $R_2 = 0.995$ ) for complex **3** (Fig. S11).



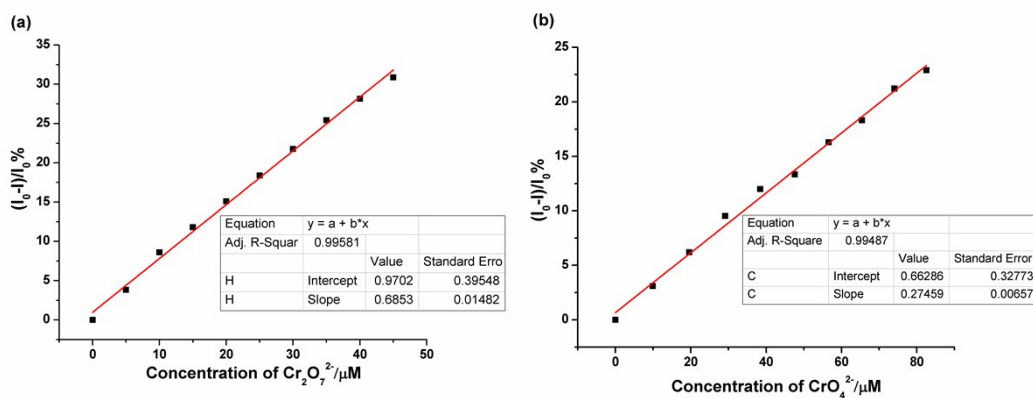

**Fig. S11** Linear region of fluorescence intensity ( $\lambda_{\text{ex}} = 290 \text{ nm}$ ) of complex **3** suspensions in water upon incremental addition of  $\text{Cr}_2\text{O}_7^{2-}/\text{CrO}_4^{2-}$  solutions.

**Table S4** LOD calculations for  $\text{Cr}_2\text{O}_7^{2-}$  and  $\text{CrO}_4^{2-}$

| Complex <b>3</b>                           | Blank | $\text{Cr}_2\text{O}_7^{2-}$ | $\text{CrO}_4^{2-}$ |
|--------------------------------------------|-------|------------------------------|---------------------|
| Fluorescence Intensity<br>Complex <b>3</b> | 1     | 3196720                      | 3543720             |
|                                            | 2     | 3245180                      | 3536540             |
|                                            | 3     | 3235170                      | 3556430             |
|                                            | 4     | 3232670                      | 3549820             |
|                                            | 5     | 3187530                      | 3554690             |
| $I_{SE}$                                   |       | 25590.32                     | 26361.41            |
| $I_0$                                      |       | 3088490                      | 3553320             |
| Standard deviation ( $\sigma$ )            |       | 0.829                        | 0.742               |
| Slope (m)                                  |       | 0.685                        | 0.276               |
| Detection limit ( $3\sigma/m$ )            |       | 3.62 $\mu\text{M}$           | 8.06 $\mu\text{M}$  |

**Table S5.** Comparison of various CPs sensors for the detection of Cr(VI).

|   | CPS <sup>a</sup>                                                                                                 | Analyte( $\text{CrO}_4^{2-}$ / $\text{Cr}_2\text{O}_7^{2-}$ ) | $K_{sv}^1$         | LOD( $\mu\text{M}$ ) | Media                | Ref |
|---|------------------------------------------------------------------------------------------------------------------|---------------------------------------------------------------|--------------------|----------------------|----------------------|-----|
| 1 | $[\text{Zn}(\text{btz})_n]$                                                                                      | $\text{CrO}_4^{2-}$                                           | $3.19 \times 10^3$ | 10                   | $\text{H}_2\text{O}$ | S2  |
|   |                                                                                                                  | $\text{Cr}_2\text{O}_7^{2-}$                                  | $4.23 \times 10^3$ | 2                    |                      |     |
|   | $[\text{Zn}(\text{tz})\text{H}_2\text{O}]_n$                                                                     | $\text{CrO}_4^{2-}$                                           | $2.35 \times 10^3$ | 20                   | $\text{H}_2\text{O}$ |     |
|   |                                                                                                                  | $\text{Cr}_2\text{O}_7^{2-}$                                  | $2.19 \times 10^3$ | 2                    |                      |     |
| 2 | $[\text{Zn}(\text{IPA})(\text{L})_n]$                                                                            | $\text{CrO}_4^{2-}$                                           | $1.00 \times 10^3$ | 18.33                | $\text{H}_2\text{O}$ | S3  |
|   |                                                                                                                  | $\text{Cr}_2\text{O}_7^{2-}$                                  | $1.37 \times 10^3$ | 12.02                |                      |     |
|   | $[\text{Cd}(\text{IPA})(\text{L})_n]$                                                                            | $\text{CrO}_4^{2-}$                                           | $1.30 \times 10^3$ | 2.52                 |                      |     |
|   |                                                                                                                  | $\text{Cr}_2\text{O}_7^{2-}$                                  | $2.91 \times 10^3$ | 2.26                 |                      |     |
| 3 | $\{[\text{Cd}(4\text{-BMPD})(\text{BPDC})] \cdot 2\text{H}_2\text{O}\}_n$                                        | $\text{Cr}_2\text{O}_7^{2-}$                                  | $6.4 \times 10^3$  | 37.6                 | $\text{H}_2\text{O}$ | S4  |
|   | $\{[\text{Cd}(4\text{-BMPD})(\text{SDBA})(\text{H}_2\text{O})] \cdot 0.5\text{H}_2\text{O}\}_n$                  | $\text{Cr}_2\text{O}_7^{2-}$                                  | $4.97 \times 10^3$ | 48.6                 |                      |     |
| 4 | $[\text{Eu}_2(\text{tpbpc})_4 \cdot \text{CO}_3 \cdot \text{H}_2\text{O}] \cdot \text{DMF} \cdot \text{solvent}$ | $\text{CrO}_4^{2-}$                                           | $4.85 \times 10^3$ | 0.33                 | $\text{H}_2\text{O}$ | S5  |

|   |                                                                             |                              |                    |      |                      |           |
|---|-----------------------------------------------------------------------------|------------------------------|--------------------|------|----------------------|-----------|
|   |                                                                             | $\text{Cr}_2\text{O}_7^{2-}$ | $1.04 \times 10^4$ | 1.07 |                      |           |
| 5 | $\text{Eu}(\text{CBIP})(\text{HCOO})(\text{H}_2\text{O})_n$                 | $\text{CrO}_4^{2-}$          | $1.54 \times 10^3$ | 1.2  | $\text{H}_2\text{O}$ | S6        |
|   |                                                                             | $\text{Cr}_2\text{O}_7^{2-}$ | $2.76 \times 10^3$ | 1.0  |                      |           |
|   | $\text{Tb}(\text{CBIP})(\text{HCOO})(\text{H}_2\text{O})_n$                 | $\text{CrO}_4^{2-}$          | $130 \times 10^3$  | 1.8  | $\text{H}_2\text{O}$ |           |
|   |                                                                             | $\text{Cr}_2\text{O}_7^{2-}$ | $2.13 \times 10^3$ | 2.1  |                      |           |
| 6 | $[\text{Cd}(4\text{-tkpvb})(5\text{-tert-BIPA})]_n$                         | $\text{CrO}_4^{2-}$          | $4.68 \times 10^4$ | 0.08 | $\text{H}_2\text{O}$ | S7        |
|   |                                                                             | $\text{Cr}_2\text{O}_7^{2-}$ | $2.50 \times 10^4$ | 0.12 |                      |           |
| 7 | $[\text{Zn}(\mu_3\text{-Hcpota})(\text{phen})]_n \cdot n\text{H}_2\text{O}$ | $\text{CrO}_4^{2-}$          | $3.51 \times 10^3$ | 8.06 | $\text{H}_2\text{O}$ | This work |
|   |                                                                             | $\text{Cr}_2\text{O}_7^{2-}$ | $1.00 \times 10^4$ | 3.62 |                      |           |

(<sup>a</sup>Abbreviations of involved ligands in compounds:  $\text{H}_2\text{btz}$  = 1,5-bis(5-tetrazolo)-3-oxapentane;  $\text{H}_3\text{ttz}$  = 1,2,3-tris-[2-(5-tetrazolo)-ethoxy]propane; L = 3-pyridylcarbox-aldehyde nicotinoylhydrazone;  $\text{H}_2\text{IPA}$  = isophthalic acid; 4-BMPD = 4,4'-(2,5-bis-(methylthio)-1,4-phenylene)dipyridine;  $\text{H}_2\text{BPDC}$  = 4,4'-biphenyldicarboxylic acid,  $\text{H}_2\text{SDBA}$  = 4,4'-sulfonyldibenzoic acid;  $\text{Htpbpc}$  = 4'-[4,2';6',4'']-terpyridin-4'-yl-biphenyl-4-carboxylic acid;  $\text{H}_2\text{CBIP}$  = 5-((2'-cyano-[1,1'-biphenyl]-4-yl)methoxy)isophthalic acid; 4-tkpvb = 1,2,4,5-tetrakis(4-pyridylvinyl)benzene; 5-tert-H2BIPA = 5-tert-butyl-isophthalic acid.) (<sup>1</sup>  $K_{\text{sv}}$  = quenching constant,  $\text{M}^{-1}$ ).

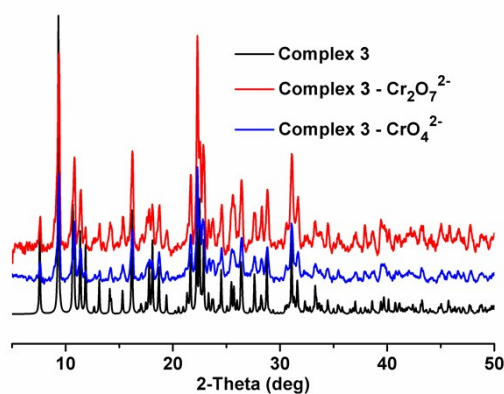

**Fig. S12** The PXRD patterns of simulated complex **3** and the PXRD patterns of **3** for the recognition of  $\text{Cr}_2\text{O}_7^{2-}$  and  $\text{CrO}_4^{2-}$  after five recycling processes.

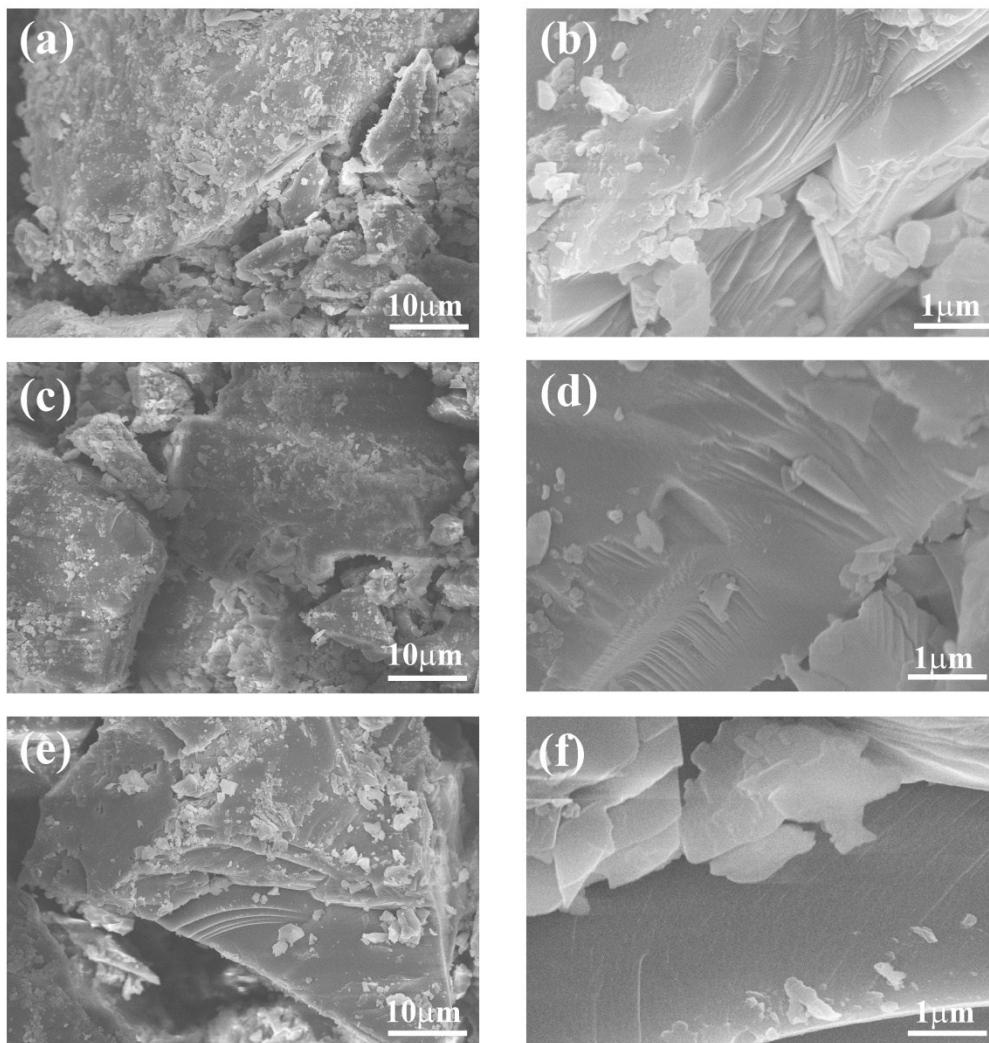

**Fig. S13** The SEM images of the (a-b) pure phase **3**, (c-d) **3** after  $\text{Cr}_2\text{O}_7^{2-}$  detection experiment, and (e-f) **3** after  $\text{CrO}_4^{2-}$  detection experiment, with the bars of 10  $\mu\text{m}$  and 1  $\mu\text{m}$ , respectively.

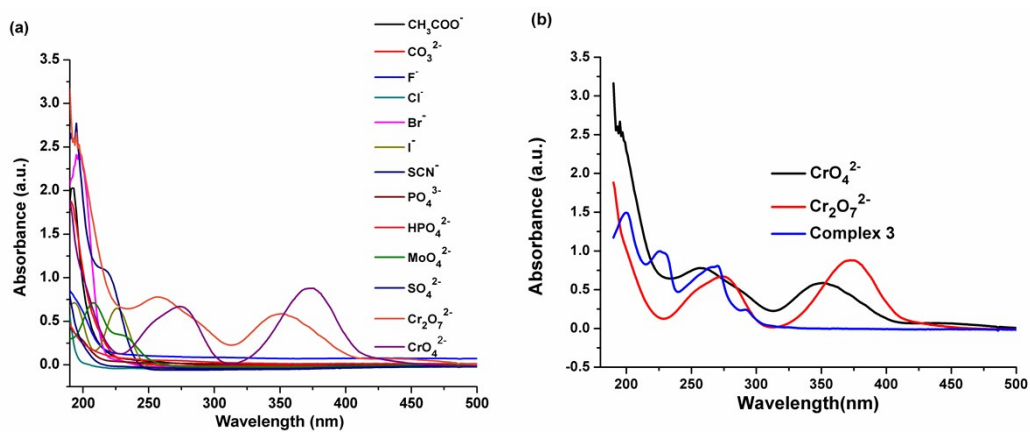

**Fig. S14** Liquid UV-vis spectra of various different anions and complex **3** in the aqueous solution.

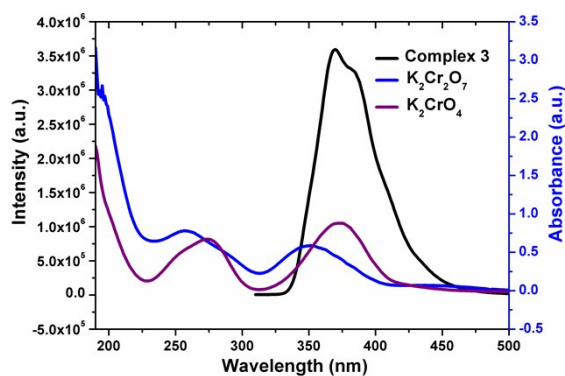

**Fig. S15** Liquid UV-vis spectra of  $\text{Cr}_2\text{O}_7^{2-}$  and  $\text{CrO}_4^{2-}$  anions and emission spectra of complex **3** in the aqueous solution.

## REFERENCES

- S1. (a) W. Liu, Y. Wang, Z. Bai, Y. Li, Y. Wang, L. Chen, L. Xu, J. Diwu, Z. Chai and S. Wang, *ACS. Appl. Mater. Inter.*, 2017, 9, 16448; (b) G.-P. Li, G. Liu, Y.-Z. Li, L. Hou, Y.-Y. Wang and Z. Zhu, *Inorg. Chem.*, 2016, 55, 3952; (c) Z.-J. Wang, F.-Y. Ge, G.-H. Sun and H.-G. Zheng, *Dalton Trans.*, 2018, 47, 8257; (d) J.-M. Han, M. Xu, B. Wang, N. Wu, X. Yang, H. Yang, B. J. Salter and L. Zang, *J. Am. Chem. Soc.*, 2014, 136, 5090.
- S2. C-S. Cao, H.-C. Hu, H. Xu, W.-Z. Qiao, and B. Zhao, *CrystEngComm*, 2016, 18, 4445.
- S3. B. Parmar, Y. Rachuri, K.K. Bisht, R. Laiya, and E. Suresh, *Inorg. Chem.*, 2017, 56, 2627.
- S4. S. Chen, Z. Shi, L. Qin, H. Jia, and H. Zheng, *Cryst. Growth.Des.*, 2017, 17, 67
- S5. J. Liu, G. Ji, J. Xiao, and Z. Liu, *Inorg. Chem.*, 2017, 56, 4197.
- S6. Z. Sun, M. Yang, Y. Ma and L. Li, *Cryst. Growth.Des.*, 2017, 17, 4326.
- S7. W. J. Gong, R. Yao, H. X. Li, Z. G. Ren, J. G. Zhang and J. P. Lang, *Dalton Trans.*, 2017, 46, 16861.
